# Supplementary material for: Organic Molecular Tracers in PM2.5 at Urban Sites during Spring and Summer in Japan: Impact of Secondary Organic Aerosols on Water-Soluble Organic Carbon
Source: MDPI journal article supplement (doi:10.3390/atmos12050579), 2021-04-30
Supplement: s1 [file s1]

## Supplementary Materials:

Fumikazu Ikemori <sup>1,\*</sup>, Rie Nishimura <sup>2</sup>, Shinji Saito <sup>3</sup>, Masayuki Akiyama <sup>4</sup>, Shigekazu Yamamoto <sup>5</sup>, Akihiro Iijima <sup>6</sup> and Seiji Sugata <sup>7</sup>

**Table S1.** Sampling dates during spring and summer at each sampling site.

| Spring |           |         |          |             |       |             |
|--------|-----------|---------|----------|-------------|-------|-------------|
| Month  | Start day | Dazaifu | Osaka    | Nagoya      | Tokyo | Sapporo     |
| April  | 21        | ○       | ○        | ○           | ○     | ○           |
|        | 22        | ○       | ○        | ○           | ○     | ○           |
|        | 23        | ○       | ○        | ○           | ○     | ○           |
|        | 24        | ○       | ○        | ○           | ○     | ○<br>3 days |
|        | 25        | ○       | ○        | ○           | ○     |             |
|        | 26        | ○       | ○        | ○           | ○     |             |
|        | 27        | ○       | ○        | ○           | ○     | ○           |
|        | 28        | ○       | ○        | ○           | ○     | ○<br>2 days |
|        | 29        | ○       | ○        | ○           | ○     |             |
|        | 30        | ○       | ○        | ○           | ○     |             |
|        | Total     | 10      | 10       | 10          | 10    | 7           |
| Summer |           |         |          |             |       |             |
| Month  | Start day | Dazaifu | Izumitsu | Nagoya      | Tokyo | Sapporo     |
| July   | 22        | ○       | ○        | ○           | ○     | ○           |
|        | 23        | ○       | ○        | ○           | ○     | ○           |
|        | 24        | ○       | ○        | ○           | ○     | ○           |
|        | 25        | ○       | ○        | ○<br>2 days | ○     | ○           |
|        | 26        | ○       | ○        |             | ○     | ○           |
|        | 27        | ○       | ○        | ○           | ○     | ○           |
|        | 28        | ○       | ○        | ○           | ○     | ○           |
|        | 29        | ○       | ○        | ○           | ○     | ○           |
|        | 30        | ○       | ○        | ○           | ○     | ○           |
|        | 31        | ○       | ○        | ○           | ○     | ○           |
| August | 1         | ○       | ○        | ○           | ○     | ○           |
|        | 2         | ○       | ○        | ○           | ○     | ○           |
|        | 3         | ○       | ○        | ○           | ○     | ○           |
|        | 4         | ○       | ○        | ○           | ○     | ○           |
|        | 5         | ○       | ○        | ○           | ○     | ○           |
|        | 6         | ○       | ○        | ○           | ○     | ○           |
|        | Total     | 16      | 16       | 15          | 16    | 16          |

**Table S2.** Correlations among OC, WSOC, and PO during (a) spring and (b) summer at each sampling site (\*p < 0.05, \*\*p < 0.01).

| (a) Spring |      |      |      | (b) Summer |      |      |      |
|------------|------|------|------|------------|------|------|------|
| Dazaifu    | WSOC | OC   | PO   | Dazaifu    | WSOC | OC   | PO   |
| WSOC       | 1.00 | 0.95 | 0.83 | WSOC       | 1.00 | 0.95 | 0.78 |
| OC         | **   | 1.00 | 0.83 | OC         | **   | 1.00 | 0.62 |
| PO         | **   | **   | 1.00 | PO         | **   | *    | 1.00 |
| Osaka      | WSOC | OC   | PO   | Izumitsu   | WSOC | OC   | PO   |
| WSOC       | 1.00 | 0.95 | 0.83 | WSOC       | 1.00 | 0.97 | 0.93 |
| OC         | **   | 1.00 | 0.77 | OC         | **   | 1.00 | 0.90 |
| PO         | **   | **   | 1.00 | PO         | **   | **   | 1.00 |
| Nagoya     | WSOC | OC   | PO   | Nagoya     | WSOC | OC   | PO   |
| WSOC       | 1.00 | 0.98 | 0.88 | WSOC       | 1.00 | 0.96 | 0.90 |
| OC         | **   | 1.00 | 0.86 | OC         | **   | 1.00 | 0.77 |
| PO         | **   | **   | 1.00 | PO         | **   | **   | 1.00 |
| Tokyo      | WSOC | OC   | PO   | Tokyo      | WSOC | OC   | PO   |
| WSOC       | 1.00 | 0.97 | 0.77 | WSOC       | 1.00 | 0.94 | 0.90 |
| OC         | **   | 1.00 | 0.68 | OC         | **   | 1.00 | 0.87 |
| PO         | **   | *    | 1.00 | PO         | **   | **   | 1.00 |
| Sapporo    | WSOC | OC   | PO   | Sapporo    | WSOC | OC   | PO   |
| WSOC       | 1.00 | 0.59 | 0.71 | WSOC       | 1.00 | 0.43 | 0.51 |
| OC         | -    | 1.00 | 0.25 | OC         | -    | 1.00 | 0.07 |
| PO         | -    | -    | 1.00 | PO         | *    | -    | 1.00 |

**Table S3.** Correlations among organic tracers during (a) spring and (b) summer at each sampling site (\*p < 0.05, \*\*p < 0.01).

## (a) Spring

| Dazaifu | DHOPA | PhA  | 4MPHA | PNOA  | PA    | 3HGA  | MBTCA | 2MTT  | 2MET  | 2MGA  | LEV   | MAN   | GLA   | tPhA  | ARA   | MAT   | GLU   |
|---------|-------|------|-------|-------|-------|-------|-------|-------|-------|-------|-------|-------|-------|-------|-------|-------|-------|
| DHOPA   | 1.00  | 0.69 | 0.70  | -0.43 | -0.09 | 0.97  | 0.61  | -0.20 | -0.27 | 0.77  | 0.22  | 0.31  | 0.27  | 0.79  | -0.58 | -0.39 | -0.10 |
| PhA     | *     | 1.00 | 0.84  | -0.70 | -0.46 | 0.61  | 0.29  | -0.42 | -0.48 | 0.33  | 0.40  | 0.58  | 0.40  | 0.32  | -0.62 | -0.30 | 0.11  |
| 4MPHA   | *     | **   | 1.00  | -0.25 | 0.01  | 0.70  | 0.60  | -0.15 | -0.32 | 0.55  | 0.65  | 0.74  | 0.62  | 0.62  | -0.40 | -0.07 | 0.24  |
| PNOA    | -     | *    | -     | 1.00  | 0.83  | -0.26 | 0.14  | 0.49  | 0.35  | -0.02 | 0.23  | 0.05  | 0.21  | 0.07  | 0.52  | 0.44  | 0.28  |
| PA      | -     | -    | -     | **    | 1.00  | 0.02  | 0.52  | 0.33  | 0.21  | 0.09  | 0.33  | 0.20  | 0.31  | 0.28  | 0.47  | 0.48  | 0.38  |
| 3HGA    | **    | -    | *     | -     | -     | 1.00  | 0.59  | -0.19 | -0.32 | 0.82  | 0.27  | 0.35  | 0.32  | 0.85  | -0.60 | -0.36 | -0.05 |
| MBTCA   | -     | -    | -     | -     | -     | -     | 1.00  | 0.35  | 0.27  | 0.57  | 0.36  | 0.35  | 0.37  | 0.69  | 0.16  | 0.28  | 0.16  |
| 2MTT    | -     | -    | -     | -     | -     | -     | -     | 1.00  | 0.95  | 0.22  | -0.19 | -0.34 | -0.21 | 0.08  | 0.67  | 0.42  | -0.30 |
| 2MET    | -     | -    | -     | -     | -     | -     | -     | **    | 1.00  | 0.07  | -0.31 | -0.47 | -0.32 | -0.07 | 0.73  | 0.38  | -0.34 |
| 2MGA    | **    | -    | -     | -     | -     | **    | -     | -     | -     | 1.00  | 0.07  | 0.10  | 0.08  | 0.92  | -0.20 | -0.10 | -0.16 |
| LEV     | -     | -    | *     | -     | -     | -     | -     | -     | -     | -     | 1.00  | 0.93  | 0.99  | 0.23  | -0.25 | -0.07 | 0.65  |
| MAN     | -     | -    | *     | -     | -     | -     | -     | -     | -     | -     | **    | 1.00  | 0.93  | 0.22  | -0.32 | 0.03  | 0.76  |
| GLA     | -     | -    | -     | -     | -     | -     | -     | -     | -     | -     | **    | **    | 1.00  | 0.22  | -0.31 | -0.13 | 0.65  |
| tPhA    | **    | -    | -     | -     | -     | **    | *     | -     | -     | **    | -     | -     | -     | 1.00  | -0.23 | -0.07 | -0.05 |
| ARA     | -     | -    | -     | -     | -     | -     | -     | *     | *     | -     | -     | -     | -     | -     | 1.00  | 0.82  | 0.13  |
| MAT     | -     | -    | -     | -     | -     | -     | -     | -     | -     | -     | -     | -     | -     | -     | **    | 1.00  | 0.42  |
| GLU     | -     | -    | -     | -     | -     | -     | -     | -     | -     | -     | *     | *     | *     | -     | -     | -     | 1.00  |

  

| Osaka | DHOPA | PhA  | 4MPHA | PNOA | PA   | 3HGA  | MBTCA | 2MTT  | 2MET  | 2MGA  | LEV   | MAN   | GLA   | tPhA  | ARA   | MAT   | GLU   |
|-------|-------|------|-------|------|------|-------|-------|-------|-------|-------|-------|-------|-------|-------|-------|-------|-------|
| DHOPA | 1.00  | 0.92 | 0.75  | 0.33 | 0.18 | 0.67  | 0.72  | -0.36 | -0.23 | 0.21  | 0.78  | 0.72  | 0.73  | 0.46  | 0.73  | 0.74  | 0.70  |
| PhA   | **    | 1.00 | 0.87  | 0.35 | 0.40 | 0.60  | 0.70  | -0.44 | -0.35 | 0.31  | 0.81  | 0.73  | 0.71  | 0.48  | 0.73  | 0.74  | 0.70  |
| 4MPHA | *     | **   | 1.00  | 0.01 | 0.17 | 0.60  | 0.79  | -0.22 | -0.18 | 0.08  | 0.51  | 0.40  | 0.34  | 0.51  | 0.71  | 0.66  | 0.67  |
| PNOA  | -     | -    | -     | 1.00 | 0.75 | -0.01 | 0.00  | -0.02 | 0.02  | 0.23  | 0.71  | 0.79  | 0.80  | -0.11 | -0.16 | -0.06 | -0.19 |
| PA    | -     | -    | -     | *    | 1.00 | 0.00  | 0.11  | -0.14 | -0.13 | 0.54  | 0.56  | 0.59  | 0.57  | 0.10  | 0.01  | 0.13  | 0.02  |
| 3HGA  | *     | -    | -     | -    | -    | 1.00  | 0.83  | 0.15  | 0.26  | 0.12  | 0.26  | 0.22  | 0.27  | 0.85  | 0.42  | 0.39  | 0.47  |
| MBTCA | *     | *    | **    | -    | -    | **    | 1.00  | -0.01 | 0.06  | 0.08  | 0.29  | 0.21  | 0.22  | 0.58  | 0.50  | 0.47  | 0.49  |
| 2MTT  | -     | -    | -     | -    | -    | -     | -     | 1.00  | 0.98  | -0.20 | -0.49 | -0.41 | -0.39 | 0.15  | -0.52 | -0.56 | -0.52 |
| 2MET  | -     | -    | -     | -    | -    | -     | -     | **    | 1.00  | -0.15 | -0.38 | -0.31 | -0.27 | 0.27  | -0.39 | -0.43 | -0.39 |
| 2MGA  | -     | -    | -     | -    | -    | -     | -     | -     | -     | 1.00  | 0.21  | 0.21  | 0.25  | 0.27  | 0.28  | 0.40  | 0.30  |
| LEV   | **    | **   | -     | *    | -    | -     | -     | -     | -     | -     | 1.00  | 0.99  | 0.97  | 0.22  | 0.52  | 0.58  | 0.50  |
| MAN   | *     | *    | -     | **   | -    | -     | -     | -     | -     | -     | **    | 1.00  | 0.99  | 0.18  | 0.42  | 0.49  | 0.41  |
| GLA   | *     | *    | -     | **   | -    | -     | -     | -     | -     | -     | **    | **    | 1.00  | 0.23  | 0.40  | 0.48  | 0.39  |
| tPhA  | -     | -    | -     | -    | -    | **    | -     | -     | -     | -     | -     | -     | -     | 1.00  | 0.51  | 0.49  | 0.60  |
| ARA   | *     | *    | *     | -    | -    | -     | -     | -     | -     | -     | -     | -     | -     | -     | 1.00  | 0.99  | 0.99  |
| MAT   | *     | *    | *     | -    | -    | -     | -     | -     | -     | -     | -     | -     | -     | -     | **    | 1.00  | 0.98  |
| GLU   | *     | *    | *     | -    | -    | -     | -     | -     | -     | -     | -     | -     | -     | -     | **    | **    | 1.00  |

  

| Nagoya | DHOPA | PhA  | 4MPHA | PNOA | PA   | 3HGA | MBTCA | 2MTT | 2MET | 2MGA | LEV  | MAN  | GLA  | tPhA | ARA  | MAT  | GLU  |
|--------|-------|------|-------|------|------|------|-------|------|------|------|------|------|------|------|------|------|------|
| DHOPA  | 1.00  | 0.92 | 0.46  | 0.27 | 0.51 | 0.90 | 0.72  | 0.34 | 0.43 | 0.75 | 0.68 | 0.59 | 0.68 | 0.78 | 0.59 | 0.50 | 0.76 |
| PhA    | **    | 1.00 | 0.74  | 0.45 | 0.64 | 0.95 | 0.89  | 0.56 | 0.60 | 0.85 | 0.60 | 0.54 | 0.60 | 0.89 | 0.74 | 0.65 | 0.87 |
| 4MPHA  | -     | *    | 1.00  | 0.48 | 0.56 | 0.70 | 0.88  | 0.68 | 0.67 | 0.69 | 0.17 | 0.14 | 0.13 | 0.73 | 0.82 | 0.79 | 0.82 |
| PNOA   | -     | -    | -     | 1.00 | 0.90 | 0.51 | 0.58  | 0.74 | 0.77 | 0.73 | 0.55 | 0.54 | 0.53 | 0.73 | 0.51 | 0.41 | 0.57 |
| PA     | -     | *    | -     | **   | 1.00 | 0.73 | 0.73  | 0.75 | 0.81 | 0.84 | 0.64 | 0.56 | 0.62 | 0.86 | 0.59 | 0.47 | 0.65 |
| 3HGA   | **    | **   | *     | -    | *    | 1.00 | 0.93  | 0.69 | 0.74 | 0.93 | 0.53 | 0.42 | 0.52 | 0.95 | 0.68 | 0.57 | 0.83 |
| MBTCA  | *     | **   | **    | -    | *    | **   | 1.00  | 0.81 | 0.83 | 0.92 | 0.33 | 0.25 | 0.31 | 0.93 | 0.74 | 0.65 | 0.86 |
| 2MTT   | -     | -    | *     | *    | *    | *    | **    | 1.00 | 0.98 | 0.85 | 0.15 | 0.08 | 0.13 | 0.80 | 0.51 | 0.45 | 0.61 |
| 2MET   | -     | -    | *     | **   | **   | *    | **    | **   | 1.00 | 0.91 | 0.28 | 0.20 | 0.25 | 0.85 | 0.58 | 0.51 | 0.68 |
| 2MGA   | *     | **   | *     | *    | **   | **   | **    | **   | **   | 1.00 | 0.55 | 0.46 | 0.52 | 0.98 | 0.70 | 0.60 | 0.86 |
| LEV    | *     | -    | -     | -    | *    | -    | -     | -    | -    | -    | 1.00 | 0.98 | 0.99 | 0.59 | 0.55 | 0.48 | 0.59 |
| MAN    | -     | -    | -     | -    | -    | -    | -     | -    | -    | -    | **   | 1.00 | 0.98 | 0.50 | 0.50 | 0.44 | 0.54 |
| GLA    | *     | -    | -     | -    | -    | -    | -     | -    | -    | -    | **   | **   | 1.00 | 0.57 | 0.47 | 0.40 | 0.54 |
| tPhA   | **    | **   | *     | *    | **   | **   | **    | **   | **   | **   | -    | -    | -    | 1.00 | 0.76 | 0.66 | 0.88 |
| ARA    | -     | *    | **    | -    | -    | *    | *     | -    | -    | *    | -    | -    | -    | *    | 1.00 | 0.98 | 0.93 |
| MAT    | -     | *    | **    | -    | -    | -    | *     | -    | -    | -    | -    | -    | -    | *    | **   | 1.00 | 0.88 |
| GLU    | *     | **   | **    | -    | *    | **   | **    | -    | *    | **   | -    | -    | -    | **   | **   | **   | 1.00 |

  

| Tokyo | DHOPA | PhA  | 4MPHA | PNOA  | PA   | 3HGA  | MBTCA | 2MTT  | 2MET  | 2MGA  | LEV   | MAN   | GLA   | tPhA  | ARA   | MAT   | GLU   |
|-------|-------|------|-------|-------|------|-------|-------|-------|-------|-------|-------|-------|-------|-------|-------|-------|-------|
| DHOPA | 1.00  | 0.86 | 0.83  | -0.04 | 0.34 | 0.56  | 0.74  | -0.01 | -0.16 | 0.72  | 0.30  | 0.35  | 0.41  | 0.61  | 0.32  | 0.32  | 0.59  |
| PhA   | **    | 1.00 | 0.92  | -0.21 | 0.16 | 0.42  | 0.55  | 0.00  | -0.07 | 0.71  | 0.54  | 0.60  | 0.65  | 0.89  | 0.52  | 0.49  | 0.73  |
| 4MPHA | **    | **   | 1.00  | -0.07 | 0.30 | 0.38  | 0.56  | 0.09  | 0.00  | 0.69  | 0.37  | 0.40  | 0.47  | 0.72  | 0.20  | 0.15  | 0.50  |
| PNOA  | -     | -    | -     | 1.00  | 0.57 | -0.20 | 0.09  | -0.27 | -0.23 | -0.42 | -0.48 | -0.53 | -0.58 | -0.40 | -0.33 | -0.26 | -0.47 |
| PA    | -     | -    | -     | -     | 1.00 | 0.62  | 0.76  | 0.46  | 0.36  | 0.41  | -0.54 | -0.52 | -0.45 | 0.04  | -0.39 | -0.30 | -0.24 |
| 3HGA  | -     | -    | -     | -     | -    | 1.00  | 0.89  | 0.65  | 0.54  | 0.88  | -0.19 | -0.09 | 0.03  | 0.45  | 0.02  | 0.09  | 0.25  |
| MBTCA | *     | -    | -     | -     | *    | **    | 1.00  | 0.44  | 0.26  | 0.82  | -0.20 | -0.13 | -0.05 | 0.47  | 0.05  | 0.14  | 0.25  |
| 2MTT  | -     | -    | -     | -     | -    | *     | -     | 1.00  | 0.93  | 0.59  | -0.53 | -0.45 | -0.31 | 0.09  | -0.44 | -0.40 | -0.19 |
| 2MET  | -     | -    | -     | -     | -    | -     | **    | 1.00  | 0.45  | 0.45  | -0.49 | -0.41 | -0.28 | 0.08  | -0.44 | -0.42 | -0.28 |
| 2MGA  | *     | *    | *     | -     | -    | **    | **    | -     | -     | 1.00  | 0.10  | 0.20  | 0.33  | 0.68  | 0.16  | 0.17  | 0.50  |
| LEV   | -     | -    | -     | -     | -    | -     | -     | -     | -     | -     | 1.00  | 0.99  | 0.96  | 0.57  | 0.69  | 0.56  | 0.75  |
| MAN   | -     | -    | -     | -     | -    | -     | -     | -     | -     | -     | **    | 1.00  | 0.98  | 0.65  | 0.72  | 0.60  | 0.79  |
| GLA   | -     | *    | -     | -     | -    | -     | -     | -     | -     | -     | **    | **    | 1.00  | 0.68  | 0.67  | 0.55  | 0.84  |
| tPhA  | -     | **   | *     | -     | -    | -     | -     | -     | -     | *     | -     | *     | *     | 1.00  | 0.68  | 0.65  | 0.74  |
| ARA   | -     | -    | -     | -     | -    | -     | -     | -     | -     | *     | *     | *     | *     | *     | 1.00  | 0.98  | 0.83  |
| MAT   | -     | -    | -     | -     | -    | -     | -     | -     | -     | -     | -     | -     | -     | *     | **    | 1.00  | 0.76  |
| GLU   | -     | *    | -     | -     | -    | -     | -     | -     | -     | -     | *     | **    | **    | *     | **    | *     | 1.00  |

| Sapporo | DHOPA | PhA  | 4MPPhA | PNOA  | PA    | 3HGA | MBTCA | 2MTT | 2MET | 2MGA | LEV   | MAN   | GLA   | tPhA  | ARA   | MAT   | GLU   |
|---------|-------|------|--------|-------|-------|------|-------|------|------|------|-------|-------|-------|-------|-------|-------|-------|
| DHOPA   | 1.00  | 0.80 | 0.16   | -0.15 | -0.09 | 0.17 | 0.19  | 0.25 | 0.09 | 0.12 | 0.54  | 0.41  | 0.48  | 0.21  | 0.15  | -0.03 | 0.54  |
| PhA     | *     | 1.00 | 0.68   | 0.16  | -0.01 | 0.22 | 0.55  | 0.55 | 0.39 | 0.40 | 0.23  | 0.17  | 0.20  | 0.53  | -0.22 | -0.28 | 0.16  |
| 4MPPhA  | -     | -    | 1.00   | 0.57  | 0.34  | 0.36 | 0.85  | 0.73 | 0.67 | 0.69 | -0.31 | -0.23 | -0.27 | 0.84  | -0.42 | -0.22 | -0.45 |
| PNOA    | -     | -    | -      | 1.00  | 0.73  | 0.67 | 0.82  | 0.34 | 0.15 | 0.75 | -0.80 | -0.85 | -0.84 | 0.71  | 0.20  | 0.44  | 0.03  |
| PA      | -     | -    | -      | -     | 1.00  | 0.93 | 0.74  | 0.55 | 0.42 | 0.88 | -0.72 | -0.70 | -0.73 | 0.77  | 0.34  | 0.59  | -0.09 |
| 3HGA    | -     | -    | -      | -     | **    | 1.00 | 0.78  | 0.68 | 0.49 | 0.92 | -0.65 | -0.63 | -0.64 | 0.77  | 0.25  | 0.42  | 0.12  |
| MBTCA   | -     | -    | *      | *     | -     | *    | 1.00  | 0.78 | 0.62 | 0.94 | -0.59 | -0.55 | -0.57 | 0.97  | -0.08 | 0.15  | -0.16 |
| 2MTT    | -     | -    | -      | -     | -     | -    | *     | 1.00 | 0.95 | 0.83 | -0.36 | -0.16 | -0.23 | 0.84  | -0.45 | -0.28 | -0.38 |
| 2MET    | -     | -    | -      | -     | -     | -    | -     | **   | 1.00 | 0.67 | -0.26 | 0.02  | -0.07 | 0.72  | -0.60 | -0.42 | -0.60 |
| 2MGA    | -     | -    | -      | -     | **    | **   | **    | *    | -    | 1.00 | -0.67 | -0.61 | -0.64 | 0.95  | 0.00  | 0.23  | -0.16 |
| LEV     | -     | -    | -      | *     | -     | -    | -     | -    | -    | 1.00 | 0.91  | 0.95  | -0.50 | 0.01  | -0.25 | 0.18  |       |
| MAN     | -     | -    | -      | *     | -     | -    | -     | -    | -    | -    | **    | 1.00  | 0.99  | -0.43 | -0.31 | -0.51 | -0.05 |
| GLA     | -     | -    | -      | *     | -     | -    | -     | -    | -    | -    | **    | **    | 1.00  | -0.47 | -0.23 | -0.45 | 0.05  |
| tPhA    | -     | -    | *      | -     | *     | *    | **    | *    | -    | **   | -     | -     | -     | 1.00  | -0.09 | 0.15  | -0.28 |
| ARA     | -     | -    | -      | -     | -     | -    | -     | -    | -    | -    | -     | -     | -     | -     | 1.00  | 0.94  | 0.57  |
| MAT     | -     | -    | -      | -     | -     | -    | -     | -    | -    | -    | -     | -     | -     | -     | **    | 1.00  | 0.35  |
| GLU     | -     | -    | -      | -     | -     | -    | -     | -    | -    | -    | -     | -     | -     | -     | -     | -     | 1.00  |

## (b) Summer

| Dazaifu | DHOPA | PhA  | 4MPPhA | PNOA | PA   | 3HGA | MBTCA | 2MTT | 2MET | 2MGA | LEV  | MAN  | GLA  | tPhA | ARA  | MAT  | GLU  |
|---------|-------|------|--------|------|------|------|-------|------|------|------|------|------|------|------|------|------|------|
| DHOPA   | 1.00  | 0.88 | 0.56   | 0.25 | 0.69 | 0.90 | 0.58  | 0.52 | 0.54 | 0.77 | 0.30 | 0.29 | 0.35 | 0.60 | 0.33 | 0.19 | 0.41 |
| PhA     | **    | 1.00 | 0.65   | 0.35 | 0.72 | 0.87 | 0.69  | 0.57 | 0.58 | 0.75 | 0.36 | 0.39 | 0.45 | 0.51 | 0.24 | 0.17 | 0.43 |
| 4MPPhA  | *     | **   | 1.00   | 0.53 | 0.90 | 0.72 | 0.85  | 0.79 | 0.82 | 0.90 | 0.65 | 0.75 | 0.89 | 0.54 | 0.58 | 0.46 | 0.56 |
| PNOA    | -     | -    | *      | 1.00 | 0.48 | 0.46 | 0.75  | 0.73 | 0.72 | 0.52 | 0.86 | 0.66 | 0.53 | 0.01 | 0.54 | 0.68 | 0.72 |
| PA      | **    | **   | **     | -    | 1.00 | 0.89 | 0.90  | 0.86 | 0.86 | 0.92 | 0.52 | 0.61 | 0.73 | 0.53 | 0.34 | 0.29 | 0.58 |
| 3HGA    | **    | **   | **     | -    | **   | 1.00 | 0.83  | 0.76 | 0.76 | 0.86 | 0.46 | 0.48 | 0.53 | 0.50 | 0.26 | 0.27 | 0.63 |
| MBTCA   | *     | **   | **     | **   | **   | **   | 1.00  | 0.88 | 0.88 | 0.84 | 0.72 | 0.69 | 0.71 | 0.32 | 0.43 | 0.46 | 0.72 |
| 2MTT    | *     | *    | **     | **   | **   | **   | **    | 1.00 | 0.99 | 0.84 | 0.62 | 0.59 | 0.63 | 0.17 | 0.46 | 0.41 | 0.76 |
| 2MET    | *     | *    | **     | **   | **   | **   | **    | **   | 1.00 | 0.85 | 0.62 | 0.59 | 0.64 | 0.18 | 0.51 | 0.41 | 0.72 |
| 2MGA    | **    | **   | **     | *    | **   | **   | **    | **   | **   | 1.00 | 0.52 | 0.54 | 0.69 | 0.56 | 0.57 | 0.37 | 0.56 |
| LEV     | -     | -    | **     | **   | *    | -    | **    | *    | **   | *    | 1.00 | 0.90 | 0.77 | 0.34 | 0.61 | 0.86 | 0.76 |
| MAN     | -     | -    | **     | **   | *    | -    | **    | *    | *    | *    | **   | 1.00 | 0.93 | 0.52 | 0.45 | 0.77 | 0.70 |
| GLA     | -     | -    | **     | *    | **   | *    | **    | **   | **   | **   | **   | **   | 1.00 | 0.63 | 0.50 | 0.66 | 0.60 |
| tPhA    | *     | *    | *      | -    | *    | *    | -     | -    | -    | *    | -    | *    | **   | 1.00 | 0.28 | 0.36 | 0.17 |
| ARA     | -     | -    | *      | *    | -    | -    | -     | -    | *    | *    | *    | -    | *    | -    | 1.00 | 0.68 | 0.39 |
| MAT     | -     | -    | -      | **   | -    | -    | -     | -    | -    | -    | **   | **   | **   | -    | **   | 1.00 | 0.75 |
| GLU     | -     | -    | *      | **   | *    | **   | **    | **   | **   | *    | **   | **   | *    | -    | -    | **   | 1.00 |

| Izumotsu | DHOPA | PhA  | 4MPPhA | PNOA | PA   | 3HGA | MBTCA | 2MTT | 2MET | 2MGA | LEV  | MAN  | GLA  | tPhA | ARA  | MAT  | GLU  |
|----------|-------|------|--------|------|------|------|-------|------|------|------|------|------|------|------|------|------|------|
| DHOPA    | 1.00  | 0.94 | 0.78   | 0.48 | 0.79 | 0.93 | 0.85  | 0.92 | 0.94 | 0.92 | 0.67 | 0.60 | 0.87 | 0.95 | 0.56 | 0.26 | 0.55 |
| PhA      | **    | 1.00 | 0.88   | 0.69 | 0.72 | 0.85 | 0.78  | 0.83 | 0.87 | 0.78 | 0.80 | 0.72 | 0.91 | 0.91 | 0.72 | 0.46 | 0.71 |
| 4MPPhA   | **    | **   | 1.00   | 0.73 | 0.73 | 0.78 | 0.77  | 0.73 | 0.75 | 0.69 | 0.64 | 0.57 | 0.69 | 0.83 | 0.77 | 0.54 | 0.80 |
| PNOA     | -     | **   | **     | 1.00 | 0.47 | 0.44 | 0.49  | 0.35 | 0.39 | 0.30 | 0.59 | 0.61 | 0.58 | 0.50 | 0.55 | 0.39 | 0.59 |
| PA       | **    | **   | **     | -    | 1.00 | 0.93 | 0.98  | 0.81 | 0.78 | 0.87 | 0.33 | 0.34 | 0.57 | 0.89 | 0.56 | 0.22 | 0.52 |
| 3HGA     | **    | **   | **     | -    | **   | 1.00 | 0.94  | 0.94 | 0.95 | 0.96 | 0.52 | 0.48 | 0.71 | 0.98 | 0.61 | 0.30 | 0.58 |
| MBTCA    | **    | **   | **     | -    | **   | **   | 1.00  | 0.86 | 0.83 | 0.91 | 0.41 | 0.41 | 0.65 | 0.91 | 0.55 | 0.20 | 0.55 |
| 2MTT     | **    | **   | **     | -    | **   | **   | **    | 1.00 | 0.99 | 0.95 | 0.50 | 0.46 | 0.70 | 0.94 | 0.57 | 0.25 | 0.57 |
| 2MET     | **    | **   | **     | -    | **   | **   | **    | **   | 1.00 | 0.94 | 0.60 | 0.53 | 0.75 | 0.96 | 0.62 | 0.33 | 0.60 |
| 2MGA     | **    | **   | **     | -    | **   | **   | **    | **   | **   | 1.00 | 0.47 | 0.40 | 0.69 | 0.94 | 0.48 | 0.16 | 0.48 |
| LEV      | **    | **   | **     | *    | -    | *    | -     | *    | *    | -    | 1.00 | 0.93 | 0.89 | 0.63 | 0.55 | 0.40 | 0.49 |
| MAN      | *     | **   | *      | *    | -    | -    | -     | -    | *    | -    | **   | 1.00 | 0.81 | 0.57 | 0.42 | 0.25 | 0.39 |
| GLA      | **    | **   | **     | *    | *    | **   | **    | **   | **   | **   | **   | **   | 1.00 | 0.79 | 0.52 | 0.28 | 0.49 |
| tPhA     | **    | **   | **     | *    | **   | **   | **    | **   | **   | **   | *    | *    | **   | 1.00 | 0.70 | 0.40 | 0.67 |
| ARA      | *     | **   | **     | *    | *    | *    | *     | *    | *    | -    | *    | -    | *    | **   | 1.00 | 0.90 | 0.94 |
| MAT      | -     | -    | *      | -    | -    | -    | -     | -    | -    | -    | -    | -    | -    | -    | **   | 1.00 | 0.86 |
| GLU      | *     | **   | **     | *    | *    | *    | *     | *    | *    | -    | -    | -    | -    | **   | **   | **   | 1.00 |

| Nagoya | DHOPA | PhA  | 4MPPhA | PNOA  | PA    | 3HGA | MBTCA | 2MTT | 2MET | 2MGA | LEV   | MAN   | GLA  | tPhA | ARA   | MAT   | GLU   |
|--------|-------|------|--------|-------|-------|------|-------|------|------|------|-------|-------|------|------|-------|-------|-------|
| DHOPA  | 1.00  | 0.72 | 0.51   | 0.27  | 0.76  | 0.92 | 0.69  | 0.94 | 0.85 | 0.84 | 0.39  | 0.40  | 0.84 | 0.46 | 0.36  | 0.27  | 0.45  |
| PhA    | **    | 1.00 | 0.69   | 0.12  | 0.69  | 0.72 | 0.65  | 0.66 | 0.57 | 0.77 | 0.29  | 0.31  | 0.70 | 0.59 | 0.47  | 0.43  | 0.53  |
| 4MPPhA | -     | **   | 1.00   | -0.24 | 0.76  | 0.72 | 0.81  | 0.56 | 0.64 | 0.74 | 0.66  | 0.67  | 0.62 | 0.45 | 0.68  | 0.64  | 0.74  |
| PNOA   | -     | -    | -      | 1.00  | -0.21 | 0.07 | -0.33 | 0.36 | 0.27 | 0.03 | -0.03 | -0.11 | 0.19 | 0.09 | -0.15 | -0.18 | -0.01 |
| PA     | **    | **   | **     | -     | 1.00  | 0.92 | 0.95  | 0.72 | 0.65 | 0.93 | 0.38  | 0.36  | 0.75 | 0.48 | 0.49  | 0.39  | 0.44  |
| 3HGA   | **    | **   | **     | -     | **    | 1.00 | 0.85  | 0.90 | 0.86 | 0.97 | 0.54  | 0.51  | 0.86 | 0.49 | 0.53  | 0.44  | 0.58  |
| MBTCA  | **    | **   | **     | -     | **    | **   | 1.00  | 0.66 | 0.63 | 0.86 | 0.43  | 0.41  | 0.69 | 0.40 | 0.59  | 0.50  | 0.53  |
| 2MTT   | **    | **   | *      | -     | **    | **   | **    | 1.00 | 0.95 | 0.82 | 0.46  | 0.46  | 0.80 | 0.43 | 0.39  | 0.30  | 0.53  |
| 2MET   | **    | *    | *      | -     | **    | **   | *     | **   | 1.00 | 0.78 | 0.61  | 0.61  | 0.70 | 0.39 | 0.53  | 0.48  | 0.71  |
| 2MGA   | **    | **   | **     | -     | **    | **   | **    | **   | **   | 1.00 | 0.47  | 0.44  | 0.82 | 0.51 | 0.51  | 0.44  | 0.55  |
| LEV    | -     | -    | **     | -     | -     | *    | -     | -    | *    | -    | 1.00  | 0.94  | 0.60 | 0.09 | 0.67  | 0.66  | 0.77  |
| MAN    | -     | -    | **     | -     | -     | -    | -     | -    | *    | -    | **    | 1.00  | 0.61 | 0.14 | 0.53  | 0.53  | 0.71  |
| GLA    | **    | **   | *      | -     | **    | **   | **    | **   | **   | **   | *     | *     | 1.00 | 0.35 | 0.32  | 0.23  | 0.41  |
| tPhA   | -     | *    | -      | -     | -     | -    | -     | -    | -    | *    | -     | -     | -    | 1.00 | 0.29  | 0.18  | 0.29  |
| ARA    | -     | -    | **     | -     | -     | *    | *     | *    | *    | -    | **    | *     | -    | -    | 1.00  | 0.98  | 0.92  |
| MAT    | -     | -    | **     | -     | -     | -    | -     | -    | -    | -    | **    | *     | -    | -    | **    | 1.00  | 0.93  |
| GLU    | -     | *    | **     | -     | -     | *    | *     | *    | **   | *    | **    | **    | -    | -    | **    | **    | 1.00  |

| Tokyo | DHOPA | PhA  | 4MPhA | PNOA | PA   | 3HGA | MBTCA | 2MTT | 2MET | 2MGA | LEV  | MAN  | GLA  | tPhA | ARA  | MAT  | GLU  |
|-------|-------|------|-------|------|------|------|-------|------|------|------|------|------|------|------|------|------|------|
| DHOPA | 1.00  | 0.91 | 0.81  | 0.04 | 0.84 | 0.97 | 0.96  | 0.80 | 0.87 | 0.91 | 0.74 | 0.74 | 0.77 | 0.80 | 0.35 | 0.42 | 0.33 |
| PhA   | **    | 1.00 | 0.94  | 0.21 | 0.84 | 0.92 | 0.93  | 0.80 | 0.84 | 0.87 | 0.70 | 0.74 | 0.79 | 0.82 | 0.45 | 0.52 | 0.42 |
| 4MPhA | **    | **   | 1.00  | 0.28 | 0.70 | 0.81 | 0.85  | 0.74 | 0.80 | 0.82 | 0.77 | 0.81 | 0.79 | 0.80 | 0.54 | 0.60 | 0.55 |
| PNOA  | -     | -    | -     | 1.00 | 0.31 | 0.13 | 0.09  | 0.49 | 0.36 | 0.28 | 0.28 | 0.36 | 0.43 | 0.08 | 0.23 | 0.20 | 0.46 |
| PA    | **    | **   | **    | -    | 1.00 | 0.93 | 0.90  | 0.85 | 0.85 | 0.89 | 0.50 | 0.56 | 0.67 | 0.65 | 0.45 | 0.50 | 0.50 |
| 3HGA  | **    | **   | **    | -    | **   | 1.00 | 0.98  | 0.86 | 0.90 | 0.94 | 0.67 | 0.70 | 0.76 | 0.78 | 0.42 | 0.48 | 0.41 |
| MBTCA | **    | **   | **    | -    | **   | **   | 1.00  | 0.82 | 0.89 | 0.93 | 0.65 | 0.69 | 0.72 | 0.81 | 0.53 | 0.60 | 0.46 |
| 2MTT  | **    | **   | **    | -    | **   | **   | **    | 1.00 | 0.98 | 0.94 | 0.71 | 0.76 | 0.82 | 0.74 | 0.46 | 0.50 | 0.54 |
| 2MET  | **    | **   | **    | -    | **   | **   | **    | **   | 1.00 | 0.98 | 0.74 | 0.78 | 0.81 | 0.79 | 0.56 | 0.60 | 0.59 |
| 2MGA  | **    | **   | **    | -    | **   | **   | **    | **   | **   | 1.00 | 0.73 | 0.77 | 0.78 | 0.80 | 0.52 | 0.57 | 0.57 |
| LEV   | **    | **   | **    | -    | *    | **   | **    | **   | **   | **   | 1.00 | 0.99 | 0.92 | 0.82 | 0.31 | 0.32 | 0.40 |
| MAN   | **    | **   | **    | -    | *    | **   | **    | **   | **   | **   | **   | 1.00 | 0.95 | 0.85 | 0.38 | 0.40 | 0.47 |
| GLA   | **    | **   | **    | -    | **   | **   | **    | **   | **   | **   | **   | **   | 1.00 | 0.83 | 0.31 | 0.32 | 0.40 |
| tPhA  | **    | **   | **    | -    | **   | **   | **    | **   | **   | **   | **   | **   | **   | 1.00 | 0.51 | 0.54 | 0.39 |
| ARA   | -     | -    | *     | -    | -    | -    | *     | -    | *    | *    | -    | -    | -    | *    | 1.00 | 0.98 | 0.86 |
| MAT   | -     | *    | *     | -    | -    | -    | *     | *    | *    | *    | -    | -    | -    | *    | **   | 1.00 | 0.84 |
| GLU   | -     | -    | *     | -    | *    | -    | -     | *    | *    | *    | -    | -    | -    | -    | **   | **   | 1.00 |

  

| Sapporo | DHOPA | PhA  | 4MPhA | PNOA  | PA    | 3HGA  | MBTCA | 2MTT  | 2MET  | 2MGA  | LEV   | MAN   | GLA   | tPhA  | ARA   | MAT   | GLU  |
|---------|-------|------|-------|-------|-------|-------|-------|-------|-------|-------|-------|-------|-------|-------|-------|-------|------|
| DHOPA   | 1.00  | 0.74 | 0.78  | -0.27 | 0.66  | 0.73  | 0.78  | 0.64  | 0.62  | 0.55  | 0.64  | 0.72  | 0.65  | 0.74  | -0.02 | -0.02 | 0.09 |
| PhA     | **    | 1.00 | 0.85  | 0.00  | 0.62  | 0.56  | 0.65  | 0.34  | 0.28  | 0.45  | 0.36  | 0.42  | 0.40  | 0.67  | 0.24  | 0.25  | 0.39 |
| 4MPhA   | **    | **   | 1.00  | -0.01 | 0.77  | 0.67  | 0.80  | 0.55  | 0.53  | 0.57  | 0.43  | 0.65  | 0.48  | 0.59  | 0.29  | 0.34  | 0.48 |
| PNOA    | -     | -    | -     | 1.00  | -0.28 | -0.42 | -0.33 | -0.37 | -0.38 | -0.39 | -0.33 | -0.40 | -0.35 | -0.49 | 0.54  | 0.49  | 0.45 |
| PA      | **    | *    | **    | -     | 1.00  | 0.93  | 0.96  | 0.76  | 0.74  | 0.81  | 0.45  | 0.63  | 0.48  | 0.75  | 0.14  | 0.25  | 0.41 |
| 3HGA    | **    | *    | **    | -     | **    | 1.00  | 0.96  | 0.86  | 0.83  | 0.87  | 0.51  | 0.67  | 0.51  | 0.79  | -0.06 | 0.03  | 0.22 |
| MBTCA   | **    | **   | **    | -     | **    | **    | 1.00  | 0.81  | 0.80  | 0.79  | 0.55  | 0.71  | 0.56  | 0.78  | 0.12  | 0.20  | 0.36 |
| 2MTT    | **    | -    | *     | -     | **    | **    | **    | 1.00  | 0.99  | 0.88  | 0.54  | 0.69  | 0.49  | 0.68  | -0.19 | -0.14 | 0.07 |
| 2MET    | *     | -    | *     | -     | **    | **    | **    | **    | 1.00  | 0.84  | 0.54  | 0.71  | 0.49  | 0.63  | -0.16 | -0.10 | 0.09 |
| 2MGA    | *     | -    | *     | -     | **    | **    | **    | **    | **    | 1.00  | 0.27  | 0.49  | 0.26  | 0.66  | -0.28 | -0.18 | 0.06 |
| LEV     | **    | -    | -     | -     | -     | *     | *     | *     | *     | -     | 1.00  | 0.90  | 0.96  | 0.76  | 0.04  | -0.01 | 0.16 |
| MAN     | **    | -    | **    | -     | **    | **    | **    | **    | **    | -     | **    | 1.00  | 0.90  | 0.72  | 0.06  | 0.05  | 0.23 |
| GLA     | **    | -    | -     | -     | -     | *     | *     | -     | -     | -     | **    | **    | 1.00  | 0.71  | 0.11  | 0.05  | 0.17 |
| tPhA    | **    | **   | *     | -     | **    | **    | **    | **    | **    | **    | **    | **    | **    | 1.00  | -0.15 | -0.11 | 0.15 |
| ARA     | -     | -    | -     | *     | -     | -     | -     | -     | -     | -     | -     | -     | -     | -     | 1.00  | 0.97  | 0.84 |
| MAT     | -     | -    | -     | -     | -     | -     | -     | -     | -     | -     | -     | -     | -     | -     | **    | 1.00  | 0.88 |
| GLU     | -     | -    | -     | -     | -     | -     | -     | -     | -     | -     | -     | -     | -     | -     | **    | **    | 1.00 |

**Table S4.** Correlations between PO and SOA tracers from all sampling sites during (a) spring ( $n = 47$ ) and (b) summer ( $n = 49$ ) (\* $p < 0.05$ , \*\* $p < 0.01$ ).

## (a) Spring

| PO        | DHOPA   | PhA     | 4MPhA   | PNOA   | PA     | 3HGA    | MBTCA   | 2MTT | 2MET | 2MGA    |
|-----------|---------|---------|---------|--------|--------|---------|---------|------|------|---------|
| All sites | 0.56 ** | 0.39 ** | 0.53 ** | 0.29 * | 0.32 * | 0.64 ** | 0.65 ** | 0.26 | 0.23 | 0.40 ** |

## (b) Summer

| PO        | DHOPA   | PhA     | 4MPhA   | PNOA    | PA      | 3HGA    | MBTCA   | 2MTT    | 2MET    | 2MGA    |
|-----------|---------|---------|---------|---------|---------|---------|---------|---------|---------|---------|
| All sites | 0.84 ** | 0.87 ** | 0.80 ** | 0.29 ** | 0.80 ** | 0.87 ** | 0.85 ** | 0.51 ** | 0.51 ** | 0.68 ** |

## (a) Dazaifu

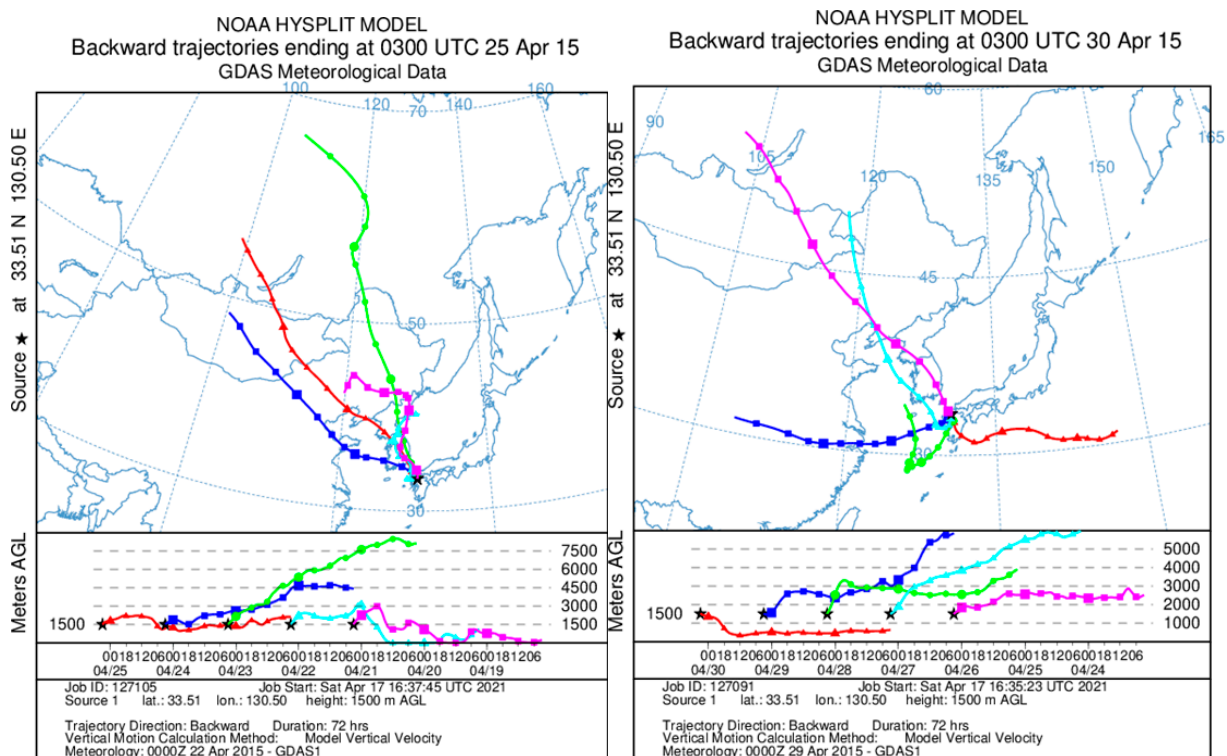

## (b) Osaka

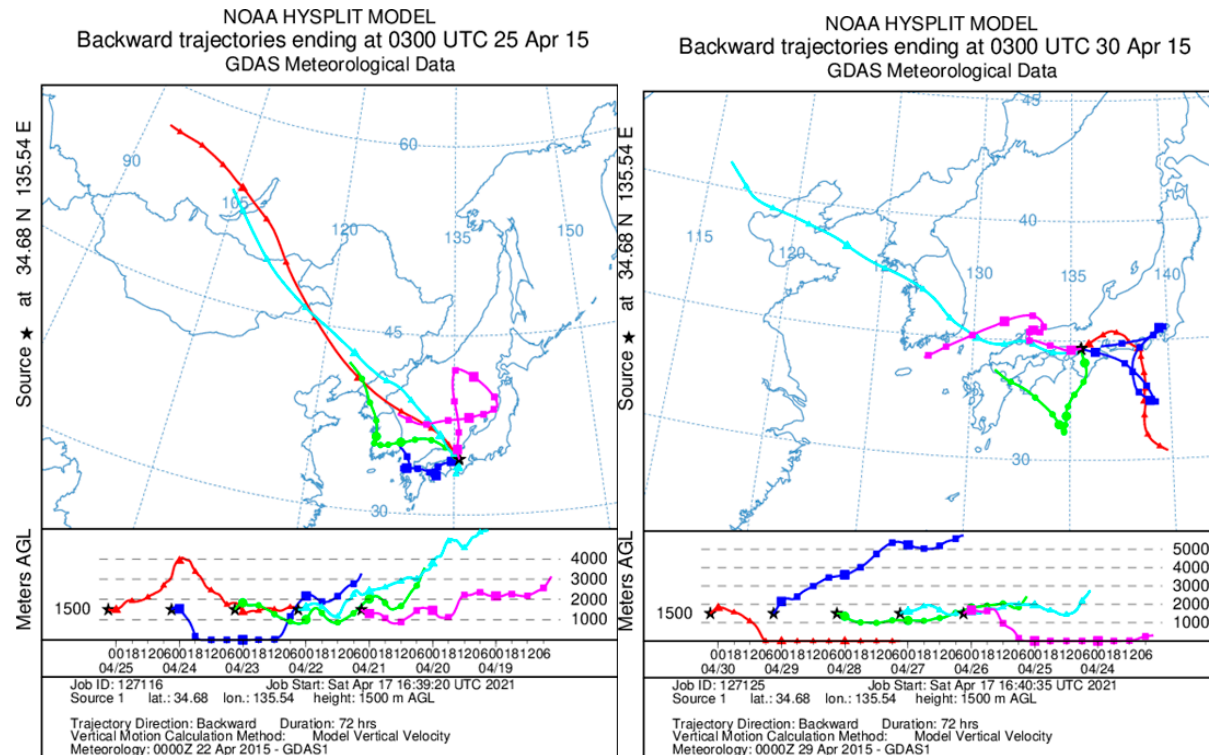

## (c) Nagoya

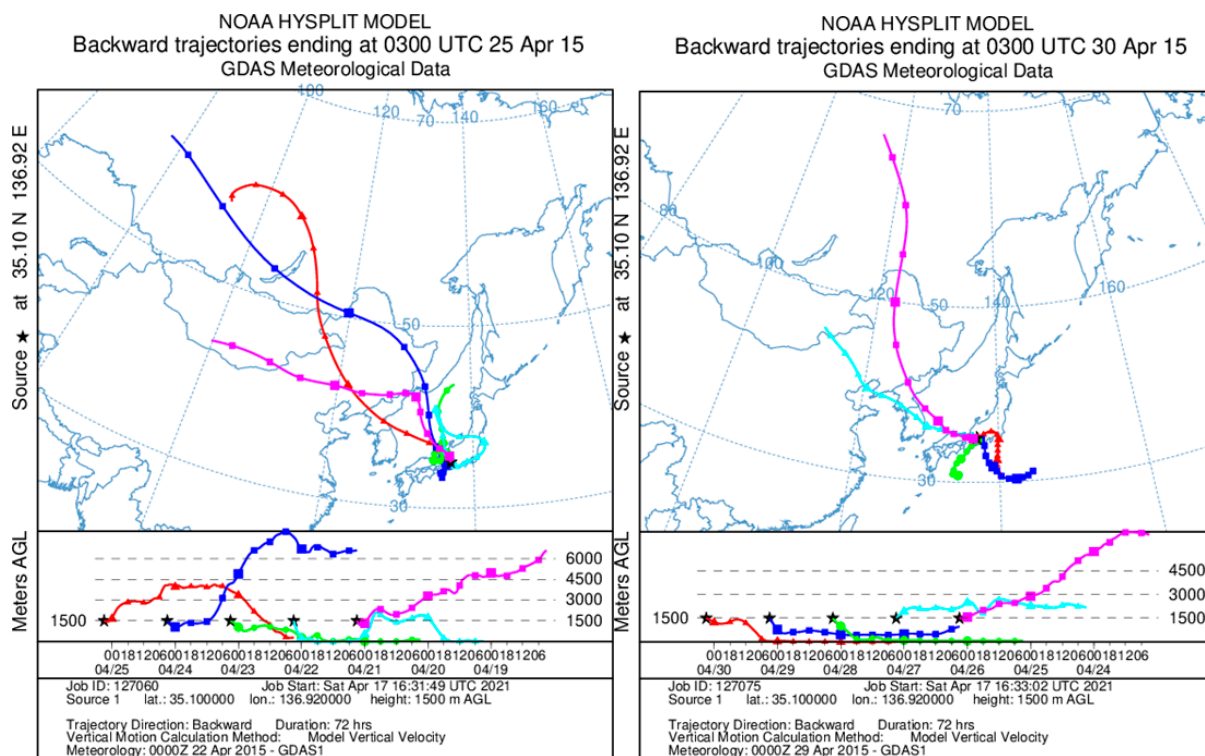

## (d) Tokyo

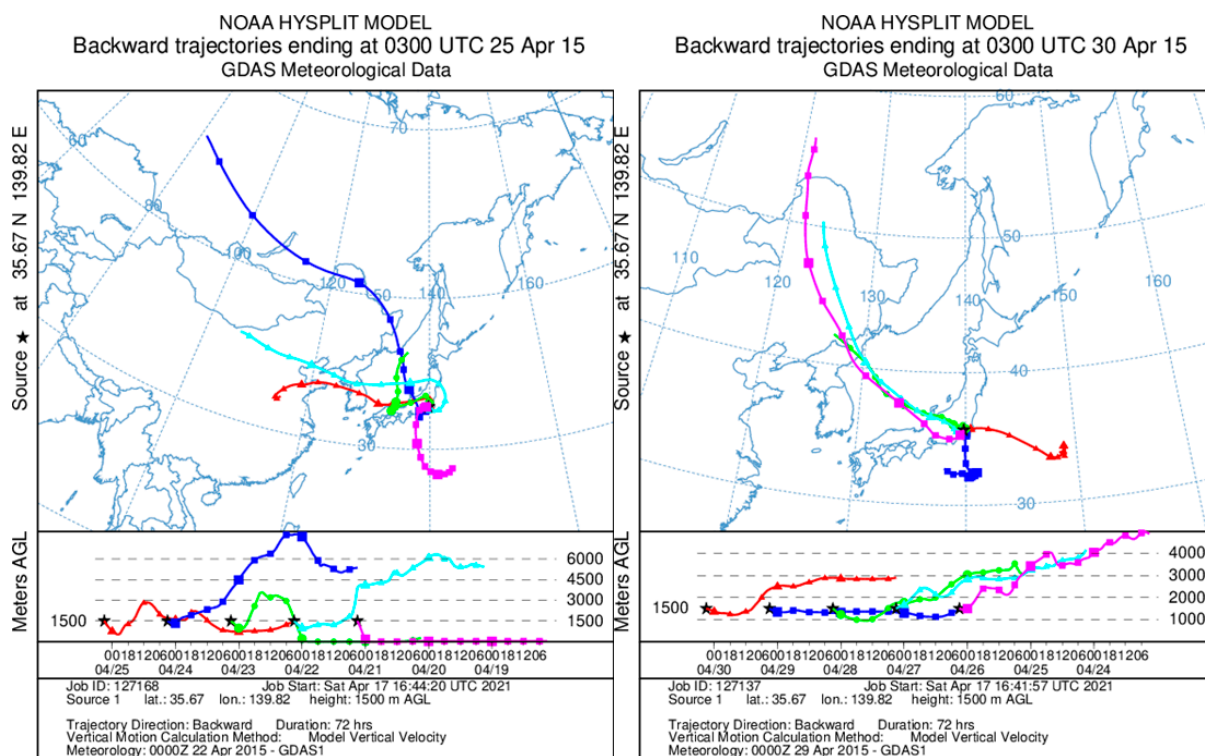



## (e) Sapporo

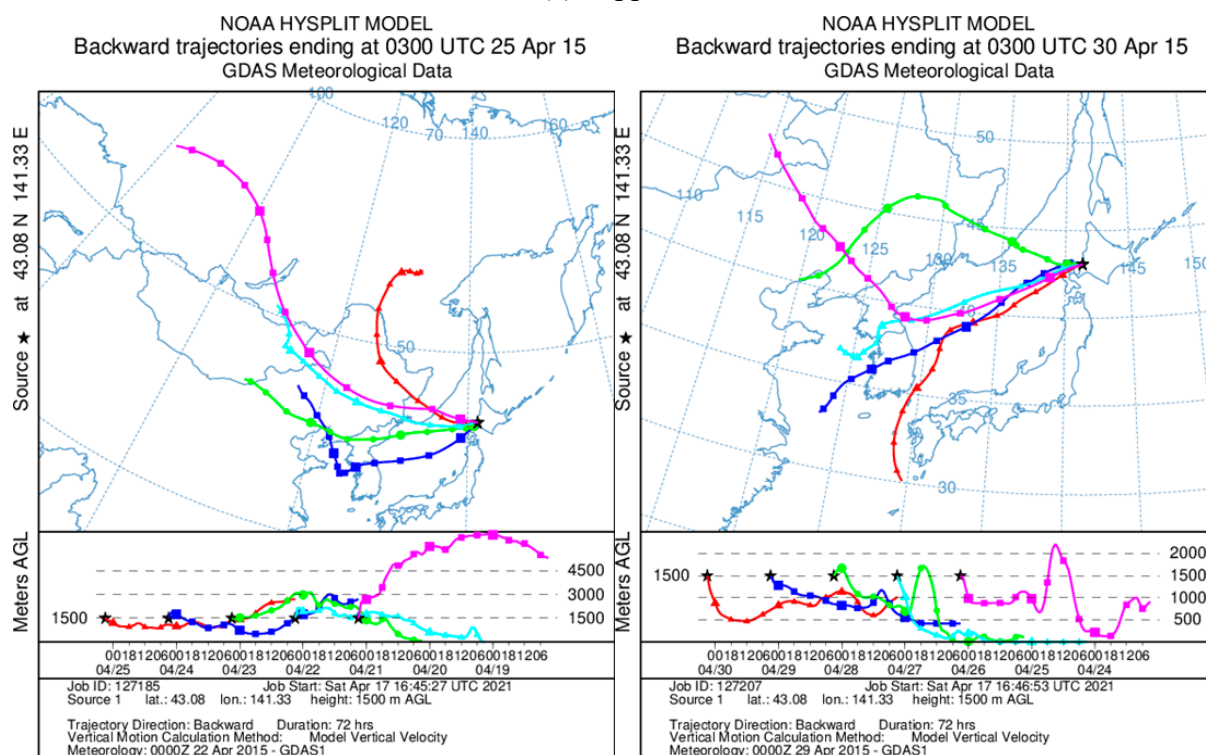

**Figure S1.** 72-h backward trajectories at (a) Dazaifu, (b) Osaka, (c) Nagoya, (d) Tokyo, and (e) Sapporo from April 21<sup>st</sup> to April 30<sup>th</sup>, 2015.

## (a) Dazaifu

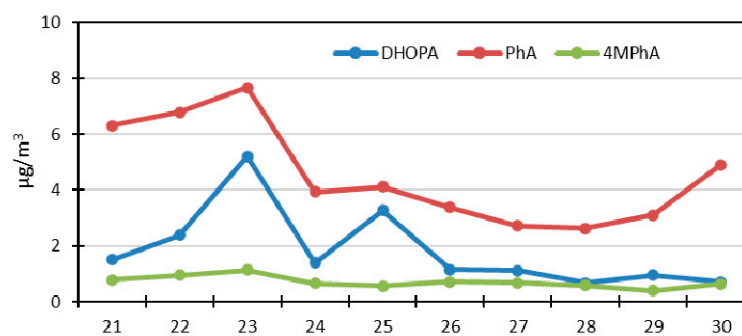

## (b) Osaka

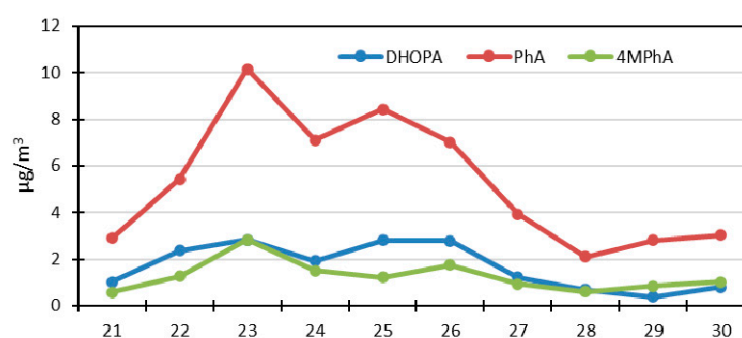

## (c) Nagoya

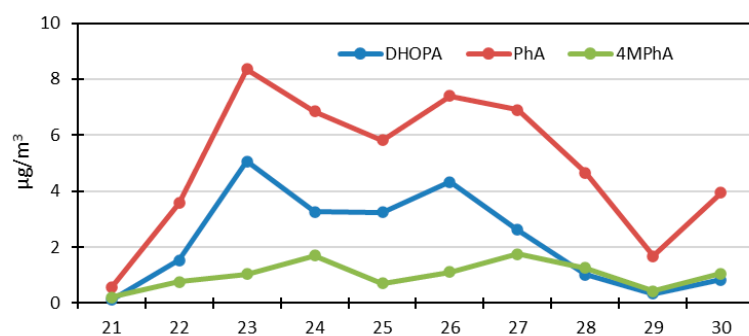

(d) Tokyo

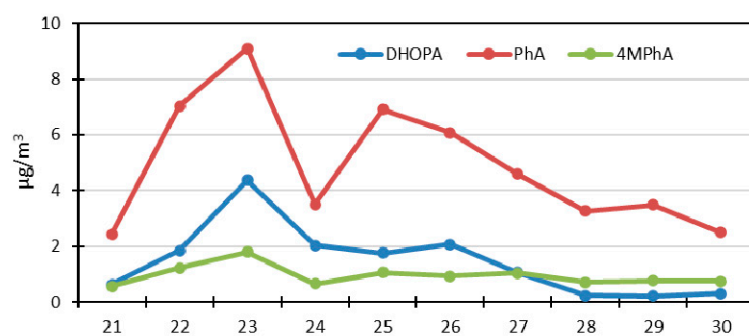

(e) Sapporo

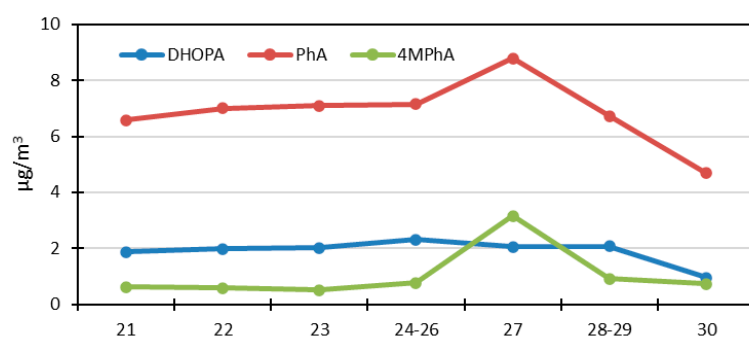

**Figure S2.** Variations in ASOA tracers (DHOPA, phthalic acid (PhA), and 4-methylphthalic acid (4MPhA)) at (a) Dazaifu, (b) Osaka, (c) Nagoya, (d) Tokyo, and (e) Sapporo from April 21<sup>st</sup> to April 30<sup>th</sup>, 2015.
